# Supplementary material for: Genome-Wide Characterization and Analysis of CIPK Gene Family in Two Cultivated Allopolyploid Cotton Species: Sequence Variation, Association with Seed Oil Content, and the Role of GhCIPK6
Source: MDPI journal article supplement (doi:10.3390/ijms21030863), 2020-01-29
Supplement: s1 [file s1]

**Figure S7.** The NAF domain in the CIPK proteins. The four cotton CIPK proteins were compared using the DNAMAN 7.0 software and conserved amino acid residues are shown in dark blue.

|          |                                                                                                                          |     |
|----------|--------------------------------------------------------------------------------------------------------------------------|-----|
| GhCIPK5  | QIRSI <sup>Q</sup> NAFDLICG...FDLSGLFDGVSEKRETRFSSRQPASVIISKLEEAARHLRLKVKKKDAGVLKMERLKEGRKGI                             | 383 |
| GhCIPK41 | QLPSI <sup>Q</sup> NAFDLICG...FDLSGLFDGVSEKRETRFSSRQPASVIISKLEEAARHLRLKVKKKDAGVLKMERLKEGRKGI                             | 383 |
| GbCIPK5  | QIRSI <sup>Q</sup> NAFDLICG...FDLSGLFDGVSEKRETRFSSRQPASVIISKLEEAARHLRLKVKKKDAGVLKMERLKEGRKGI                             | 383 |
| GbCIPK41 | ....I <sup>Q</sup> NAFDVISFSSGLNLSGLIDESH <sup>Q</sup> DYG.E <sup>Q</sup> RFILRESPEKLVEKVEQLGKGERLKVKKK....KQWAVEIEGKEGI | 331 |
