# Supplementary figures and images for: Genome-Wide Characterization and Analysis of CIPK Gene Family in Two Cultivated Allopolyploid Cotton Species: Sequence Variation, Association with Seed Oil Content, and the Role of GhCIPK6
Source: MDPI journal article supplement (doi:10.3390/ijms21030863), 2020-01-29

**Figure S6.** Sequence logos of cotton CIPK proteins.

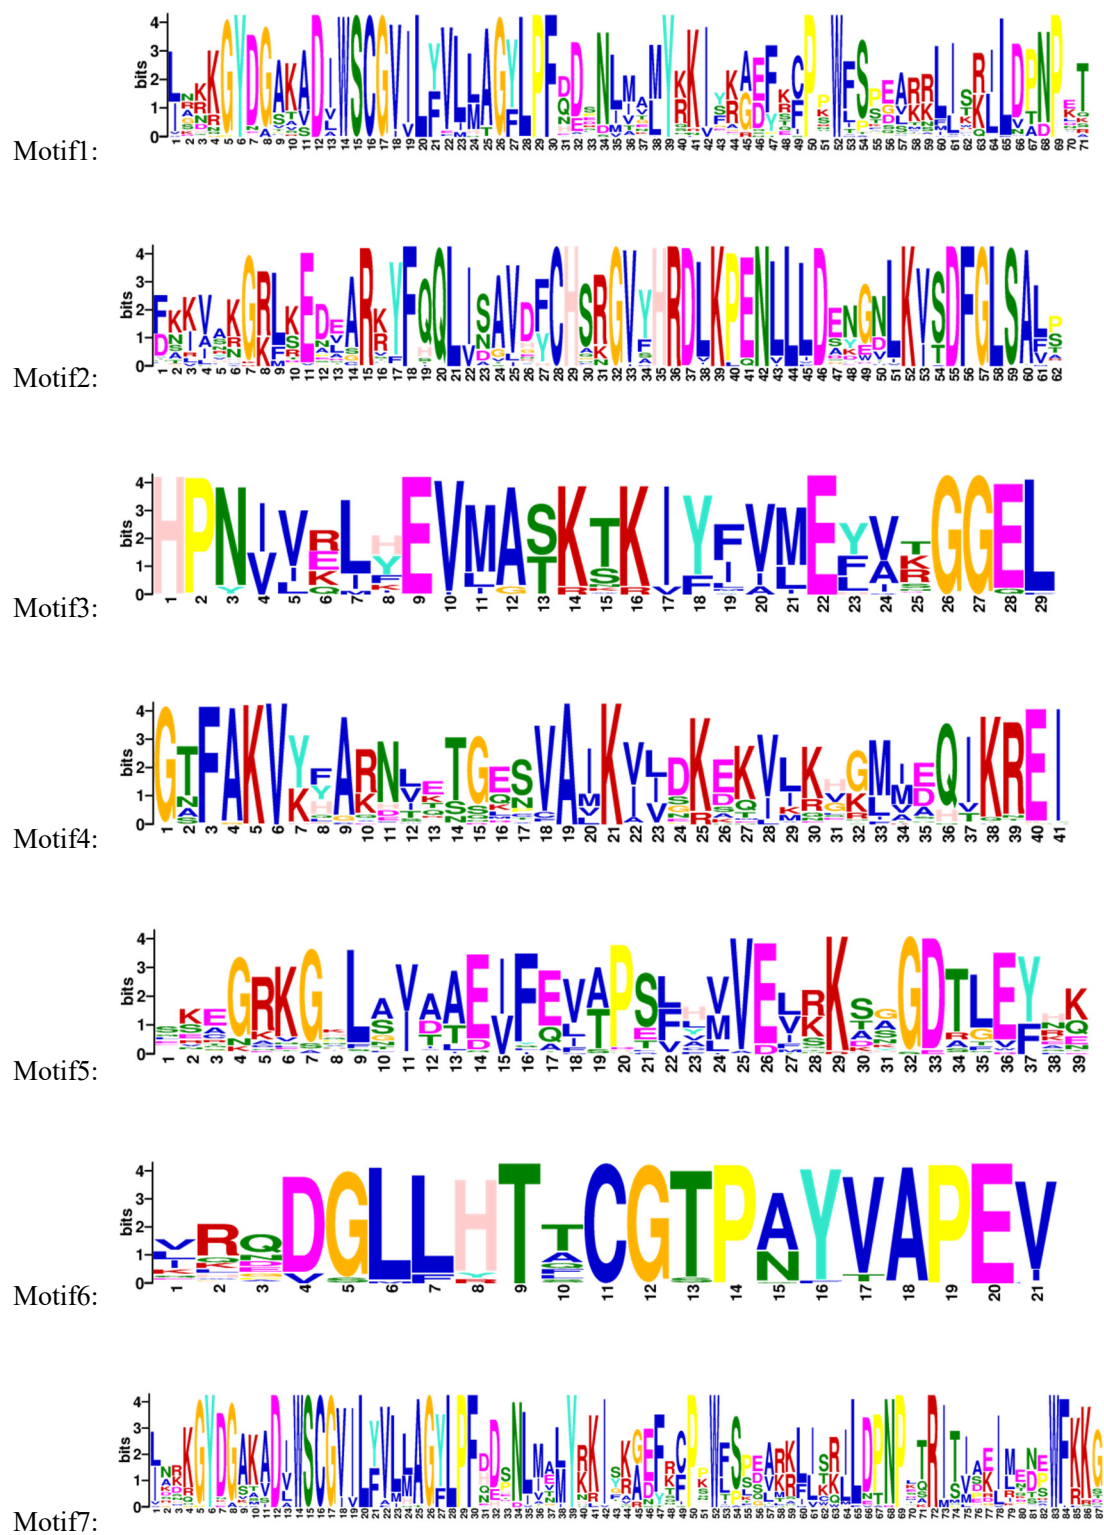

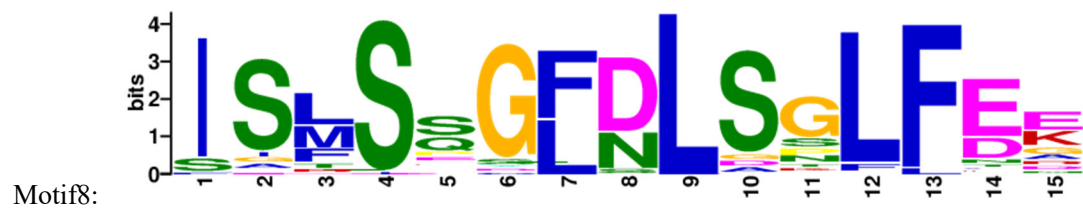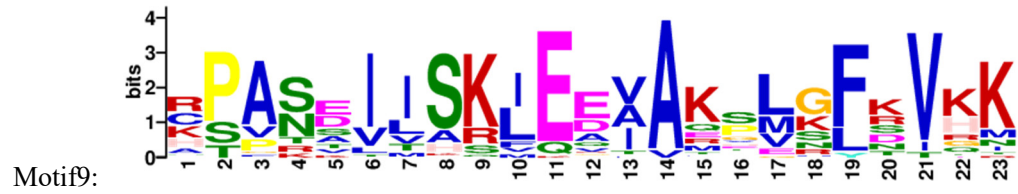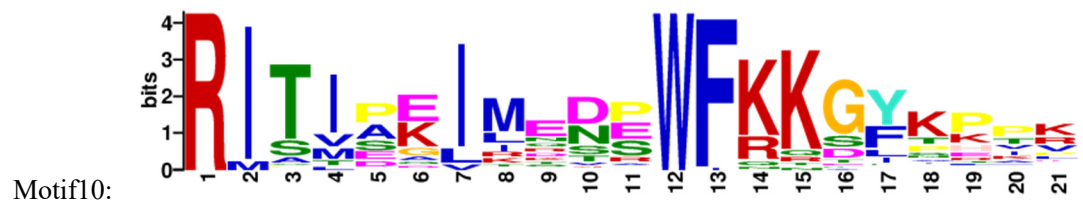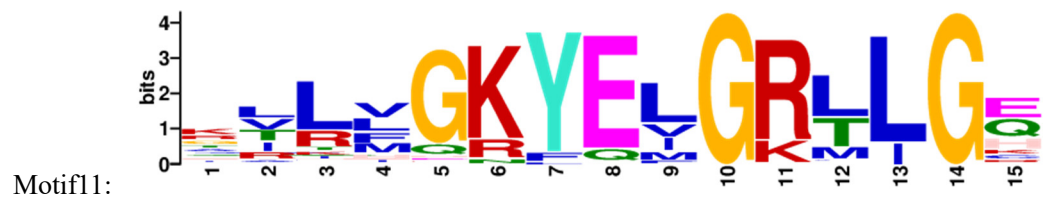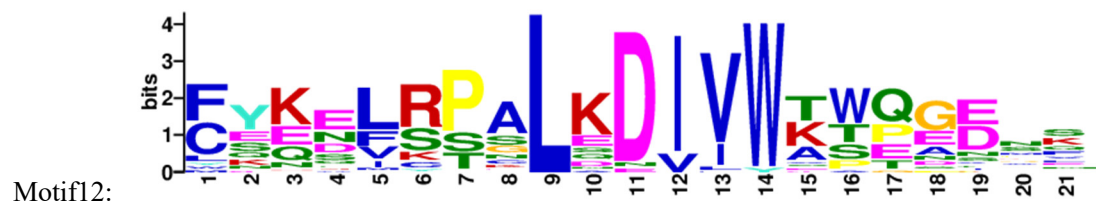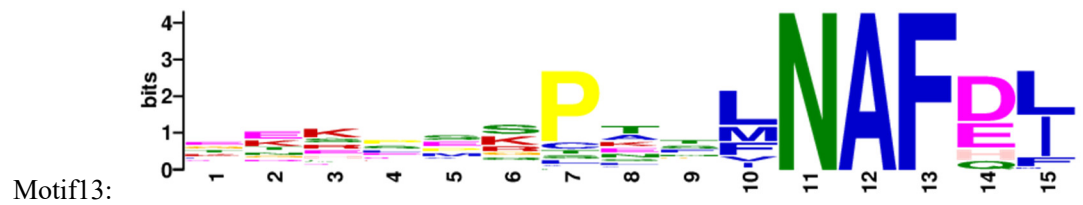

Motif14:

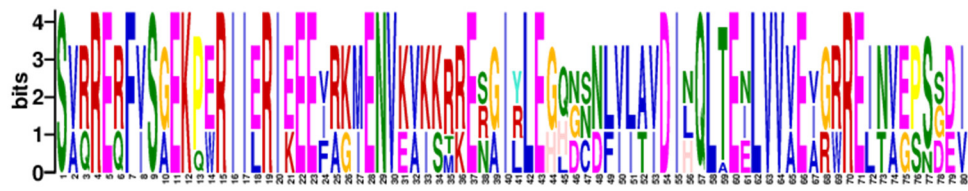

Motif15:

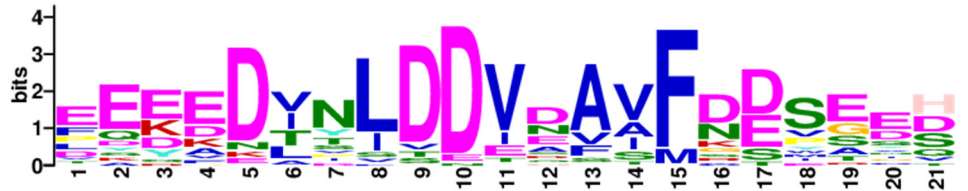

Motif16:

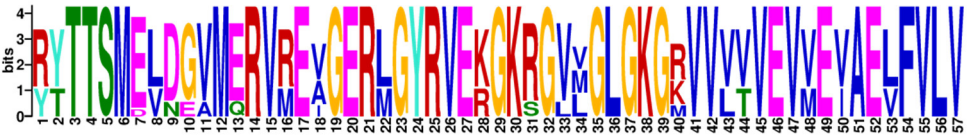

Motif17:

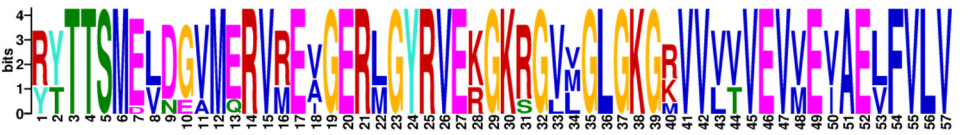

Motif18:

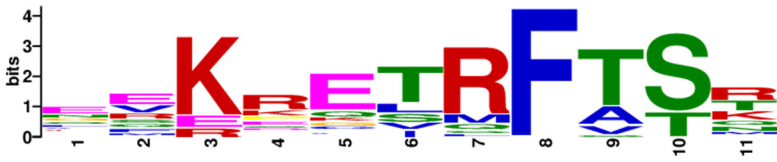

Supplement: s1 [file s1]
